# Supplementary material
Source: Springer Nature journal article supplement (https://www.springermedizin.de/resource/supplementary/13044_2010_21_MOESM3_ESM.pdf/9659968)

30/04/2007 13:01:19

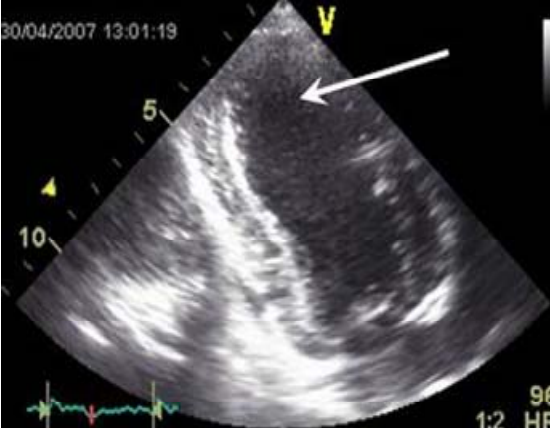

30/04/2007 13:00:40

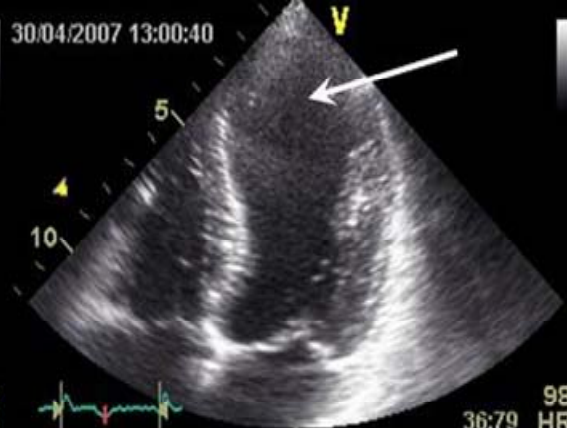

30/04/2007 13:00:13

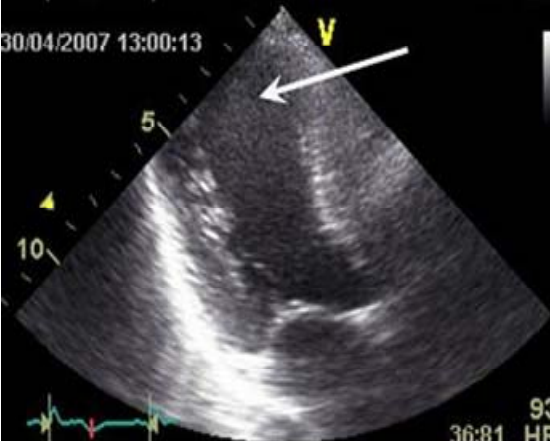

36:79 2DS

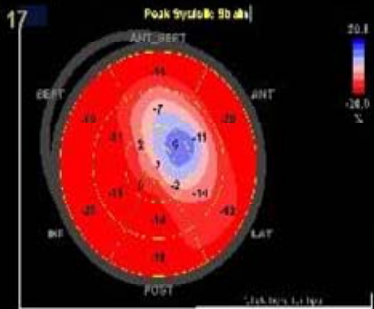

|           |         |          |           |
|-----------|---------|----------|-----------|
| OLPES_LAX | -12.4 % | HR_ApLAX | 93.0 bpm  |
| OLPES_AAC | -11.2 % | AVC_MEAP | 1.271 sec |
| OLPES_A20 | -14.1 % |          |           |
| OLPES_Avg | -12.6 % |          |           |

Supplement: MOESM3 [file 9659968]
